# Supplementary material for: Heparin-binding protein as a novel biomarker for sepsis-related acute kidney injury
Source: PeerJ. 2020 Oct 14;8:e10122. doi: 10.7717/peerj.10122 (PMC7568480; doi:10.7717/peerj.10122)
Supplement: Supplemental Information 4 [file peerj-08-10122-s004.xlsx]

## Sheet: Tabelle1
id	age	gender	unit_ICU1_IMC0	infection_origin_1lung_2abd_3skin_4uti_5viral_6unkn	crp_max	wbc_max	krea_baseline	gfr_baseline	urineoutput_minimum	survivded	RRT	infection_origin_1lung_2abd_3skin_4uti_5viral_6unkn	cpr	mechanical ventilation	vasopressors	hbp_d1	hbp_d2	hbp_d3	hbp_d4	hbp_d5	hbp_d6	hbp_mean	hbp_peak	grza_d1	grza_d2	grza_d3	grza_d4	grza_d5	grza_d6	grza_mean	grza_peak	aki_stage	urineoutput_d1	urineoutput_d2	urineoutput_d3	urineoutput_d4	urineoutput_d5	urineoutput_d6	gfr_d1	gfr_d2	gfr_d3	gfr_d4	gfr_d5	gfr_d6	krea_d1	krea_d2	krea_d3	krea_d4	krea_d5
1	49	1	0	1	29.67	19780	0.71	110.169	1000	1	0	1	0	0	0									9.9	3.94					6.92	9.9	0		1500	1600	1400	1000		107.13	105.992	109.537	108.311	110.169	106.556	0.76	0.78	0.72	0.74	0.71
2	62	1	1	5	23.32	19220	0.64	104.936	1200	1	0	5	0	1	0									5.91	10.91					8.41	10.91	0	2000	1900		1200		4400	104.936	94.3029	94.3029	95.7406	97.2565	97.2565	0.64	0.83	0.83	0.8	0.77
3	39	1	1	1	10.83	12780	0.66	121.787	2500	1	0	1	1	1	0			40.0767	12.7562			26.4164	40.0767	8.04	8.63	10.24	9.31			9.055	10.24	0	4000		7200	3900	2500		116.193	116.193	113.706	117.509	121.787	110.295	0.74	0.74	0.78	0.72	0.66
4	79	0	1	1	16.12	9400	1.83	25.7856	1200	1	0	1	1	1	1									8.72	6.57	5.98	4.87	9.39		7.106	9.39	0		2070	1200	2200	2100		25.7856	25.7856	25.7856	25.2837	25.7856	23.1599	1.83	1.83	1.83	1.86	1.83
5	67	0	1	6	10.41	35120	0.59	94.8404	1300	1	0	6	0	1	1					31.7283	37.3093	34.5188	37.3093	129.77	117.94	57.39	39.1	28.3		74.5	129.77	0	1300	1800		1900	2900	3600	78.6589	68.9305	75.1505	83.828	91.8661	94.8404	0.78	0.87	0.81	0.74	0.65
6	74	1	1	1	35.86	660	2.12	29.7579	700	0	0	1	0	1	1						13.1041	13.1041	13.1041	15.7	15.71	13.87	21.56	10.49		15.466	21.56	1		3300	1300	750	700	1100	29.7579	29.7579	25.743	20.3753	18.8705	16.8706	2.12	2.12	2.39	2.9	3.09
7	46	0	1	2	16.47	21910	0.65	106.468	90	1	0	2	0	1	1	36.555		35.8054	42.8999			38.4201	42.8999	58.59	59.7	42.32	12.09	9.81		36.502	59.7	2		90	160	350	480	1400	44.5605	47.8211	47.8211	89.7687	85.8134	106.468	1.41	1.33	1.33	0.79	0.82
8	71	1	1	2	13.31	14340	1.18	61.7148	3500	1	0	2	0	1	1										9.39	6.43	7.02	2.5		6.335	9.39	0			3500	4500	5500	4300	49.761	53.4021	53.4021	49.761	53.8916	61.7148	1.41	1.33	1.33	1.41	1.32
9	57	1	1	1	28.81	32190	0.56	114.819	710	1	0	1	0	1	1									6.06	5.24	9.14				6.81333	9.14	0		1000	710	780	1100	980	106.66	106.66	111.609	107.322	114.819	111.609	0.67	0.67	0.6	0.66	0.56
10	41	1	1	3	47.36	15260	1.55	54.7907	2600	1	0	3	0	0	0									10.49	13.19	4.02				9.23333	13.19	2		2600	3700	6800			23.8869	30.156	39.7784	50.4321	54.7907		3.08	2.54	2.02	1.66	1.55
11	84	1	1	1	27.88	14350	0.86	79.6289	460	1	0	1	1	1	1									8.88		2.58			2.66	4.70667	8.88	0			460	750	2100	1300	78.1549	75.1172	74.1521	79.6289	78.8801	79.6289	0.9	0.93	0.94	0.86	0.88
12	36	1	1	1	25.74	14970	2.43	32.9514	865	1	1	1	0	1			21.3837					21.3837	21.3837			12.34	15.27			13.805	15.27	3	865						22.1905	15.8564	15.8564	19.9508	29.8093	32.9514	3.37	4.45	4.45	3.68	2.64
13	68	0	1	3	37.52	15570	0.54	96.9606	910	1	0	3	0	1	1	15.6486			16.2649	14.2166	10.8093	14.2349	16.2649	0.9	3.26	2.28	3.91	5.06	4.89	3.38333	5.06	1	1100		910	1120	1130	1200	54.5282	75.7536	75.7536	92.6523	94.7077	96.9606	1.05	0.8	0.8	0.62	0.58
14	81	1	1	1	29.66	14860	1.03	67.8059	1900	0	0	1	0	1	1		7.1059	39.9981	27.8352	19.2358		23.5437	39.9981	7.09	6.59	13.57	5.78	1.96	4	6.49833	13.57	1	2100		2400	1900	5800	2700	58.1234	67.8059	67.8059	46.3854	38.0782	39.2179	1.17	1.03	1.03	1.41	1.66
15	76	0	1	2	15.83	15010	1.21	43.4256	35	1	1	2	0	1	1		10.7467	54.7799		22.3405		29.289	54.7799	11.29	13.84	24.11	23.84	20.9		18.796	24.11	3	870		100	50	75	35	11.6607	13.8166	13.8166	23.9423	35.484	43.4256	3.59	3.12	3.12	1.98	1.43
16	79	1	1	1	9.33	9260	0.99	72.1383	4000	1	0	1	0	1	1	11.8763	11.9404					11.9084	11.9404	0	3.67	1.06				1.57667	3.67	1	4000		5100				50.9466	60.1874	60.1874	72.1383			1.32	1.15	1.15	0.99
17	69	1	0	1	31.42	18700	1.01	75.5391	1200	1	0	1	0	0	0			70.0612	31.8424	12.6172		38.1736	70.0612			3.02	2.94	4.97	2.78	3.4275	4.97	1		1200	5000	2500	2700		42.3508	50.0357	53.6694	71.2528	69.6606	75.5391	1.63	1.42	1.34	1.06	1.08
18	84	1	1	1	25.46	16430	0.95	73.2095	1100	1	0	1	0	0	0		16.3789	14.5622	21.7898	15.7769		17.1269	21.7898	0	0	0	0	0	0	0	0	0		3800	1100	1300	2400		60.6512	60.6512	73.2095	70.5087	73.2095		1.11	1.11	0.95	0.98	0.95
19	74	1	0	1	21.02	470	1.82	35.7863	700	0	0	1	0	0	0	17.5829	45.7769	26.4157	81.4571	13.0589		36.8583	81.4571	0	1.14	0	2.28	0		0.684	2.28	2	700		1400				24.9828	24.9828	24.6179	35.7863			2.45	2.45	2.48	1.82
20	57	0	1	1	28.93	5710	0.94	67.342	1000	1	0	1	0	1	1									4.15	2.2			0	0	1.5875	4.15	1	1000	2700	2600	3300	3600	3200	46.364	46.364	53.9046	65.6495	67.342	64.0332	1.28	1.28	1.13	0.96	0.94
21	68	1	0	1	10.51	13500	1.13	66.4164	2100	1	0	1	0	0										2.94	2.45					2.695	2.94	1	3100	4100	2800	2100	2300		42.0251	53.5641	53.0883	56.5906	66.4164		1.65	1.35	1.36	1.29	1.13
22	64	0	0	1	16.79	30540	0.48	103.664	710	1	0	1	0	0															21.52	21.52	21.52	0			710	2200	2600	2000	81.5972	81.5972	90.0059	96.8603	103.664	101.617	0.77	0.77	0.71	0.59	0.48
23	75	1	1	1	29.14	13650	1.25	55.9664	290	0	1	1	0	1	1			30.7843		90.5785		60.6814	90.5785		20.12		42.96	33.28	18.26	28.655	42.96	3	630		950	900	290		55.4299	51.4544	55.9664	41.8411	35.5358	43.15	1.26	1.34	1.25	1.59	1.82
24	72	0	0	4	21.27	10720	1.01	55.5663	0	1	0	4	0	0	0	23.8842	31.9813		25.6889	23.3065	18.9	24.7522	31.9813	22.7	29.46		20.36	23.4	22.46	23.676	29.46	1							36.8061	34.1706	34.1706	41.7272	47.0009	55.5663	1.42	1.51	1.51	1.28	1.16
25	57	1	0	3	5.05	10280	1.8	40.8678	800	1	0	3	0	0	0			22.5522		23.9702	23.1013	23.2079	23.9702		42.96	23.16		22.22	22.22	27.64	42.96	1					800	1400	40.8678	34.9217	36.6434	28.5741	28.7175	29.3045	1.8	2.05	1.97	2.42	2.41
26	40	1	1	1	25.7	54430	1.7	49.3464	20	0	1	1	0	1	1	77.4365	87.0852	79.0836	68.8286			78.1085	87.0852	13.1	12.16	13.48	15.48			13.555	15.48	3				20	150		15.459	15.8466	33.0216	49.3464			4.44	4.35	2.37	1.7
27	18	0	1	1	36.43	10170	0.58	134.562	1800	1	0	1	0	1	1	57.9482		35.8866	29.4844	22.8482	18.16	32.8655	57.9482	21.76		11.98	16.26	20.6	23.16	18.752	23.16	1			2300	1800			92.1077	128.325	133.07	134.562			0.91	0.67	0.6	0.58
28	85	0	1	1	2.04	8750	2.75	15.1086	750	1	0	1	0	1	1	13.8966					20.9529	17.4247	20.9529	11.6					9.16	10.38	11.6	0		750	1500	2300	1500		13.6549	14.1101	14.5316	15.1086	13.9362	13.6549	2.99	2.91	2.84	2.75	2.94
29	45	0	1	1	5.25	10130	0.39	126.841	940	0	0	1	0	1	1	34.4687		32.9409	21.3444			29.5846	34.4687	24.56	29.46	22.94	20.12		46	28.616	46	0	1500	2200	3800	2600	940	1600	121.008	119.289	121.906	124.771	125.789	126.841	0.45	0.47	0.44	0.41	0.4
30	71	1	1	1	18.43	16400	0.99	76.3083	2100	1	0	1	1	1	1		33.8241		22.6859	18.0502	19.6686	23.5572	33.8241	8.42	8.04		5.7	7.44	9.16	7.752	9.16	1			2800	4000	2100	2200	66.4507	76.3083	76.3083	63.6665	60.4735	61.0884	1.11	0.99	0.99	1.15	1.2
31	73	1	0	2	11.17	13420	0.89	84.822	0	0	0	2	0	0	0			18.3939	17.9021	16.4938	30.1814	20.7428	30.1814	34.12	21.52		27.6	20.12	19.9	24.652	34.12	1							84.822	84.822	55.6794	52.1824	57.3121	64.817	0.89	0.89	1.27	1.34	1.24
32	52	1	1	2	7.98	9610	0.96	90.5093	1800	1	0	2	0	0		48.8008	46.4185	42.5896	30.6254	34.3541	32.2773	39.1776	48.8008	20.6	16.66	15.26	15.66	15.26	33.84	19.5467	33.84	1		1800	4600	4500	5500	6400	52.3451	39.6503	39.6503	53.1958	75.1198	90.5093	1.51	1.9	1.9	1.49	1.12
33	49	1	1	1	7.05	12010	2.15	34.8733	990	1	0	1	1	1	1	25.6937	25.6364	31.5182		23.0344		26.4707	31.5182	16.86	20.6	21.06	24.08			20.65	24.08	2	990	2700	3300	2500	2400		32.8318	32.4839	32.8318	31.9746	34.8733		2.26	2.28	2.26	2.31	2.15
34	64	1	1	1	4.35	7590	0.84	92.5307	2000	1	0	1	1	1	1		7.9145	11.4044	14.7416	11.161		11.3054	14.7416	7.66	12.36		25.26	21.06		16.585	25.26	0	2000	2700	3500	5200	2700	2400	92.5307	89.9438	88.7502	90.3577	87.5852	79.1863	0.84	0.9	0.91	0.89	0.92
35	74	0	1	1	16.1	11440	0.56	91.8533	670	1	0	1	1	0			39.9399	28.3386	16.594	10.9366	15.8683	22.3355	39.9399		15.06	17.66	16.86	14.86	18.26	16.54	18.26	2	950	670	2500	3300	4100	3300	91.8533	91.8533	65.623	65.623	61.336	73.7401	0.56	0.56	0.87	0.87	0.92
36	50	0	1	2	22.84	17270	0.65	103.519	140	1	0	2	0	1	1									2.26		2.26				2.26	2.26	1	140	320	1600				53.7338	76.6079	102.492	103.519			1.18	0.88	0.67	0.65
37	78	1	0	7	11.12	1820	1.21	56.997	0	1	0	7	0	0	0	38.8132		50.2761	40.9711	48.7292	51.6128	46.0805	51.6128	35.2		39.24	31.86	35.84	38.4	36.108	39.24	1							40.0531	40.6592	46.9703	49.0506	53.2504	56.997	1.62	1.6	1.42	1.37	1.28
38	43	1	1	1	12.29	16950	0.7	115.583	1600	1	0	1	1	1	0									3.7	12.92					8.31	12.92	0	1600		3700	2000	3300	2300	115.583	112.973	112.973	111.742	111.143	109.978	0.7	0.74	0.74	0.76	0.77
39	28	1	1	1	25.26	5000	0.68	129.966	145	1	0	1	0	1	1									11.98		6.86	13.3			10.7133	13.3	1	2200	145	1900	2100	3200		129.966	105.796	124.159	125.527	121.569	122.84	0.68	0.97	0.76	0.74	0.8
40	66	0	1	1	22.22	5750	0.59	95.509	460	0	0	1	1	1	1									6.28	8.04	80.32	6.36			25.25	80.32	1	2100	460	1900	2400			95.509	88.7502	83.06	92.9868			0.59	0.71	0.75	0.64
41	52	1	1	7	26.56	15090	0.85	100.18	580	1	0	7	1	1	1	17.5632	21.6881	20.9815	19.1434	21.2107		20.1174	21.6881	6.54	7.62	7.62	6.54	8.72		7.408	8.72	1	580	1300	4200	3500	2900		78.4964	78.4964	91.6624	96.5558	100.18	90.5093	1.08	1.08	0.95	0.91	0.85
42	24	1	0	4	18.35	8840	1.47	65.8254	0	1	0	4	0	0	0										44.16					44.16	44.16	1							35.1487	32.5802	40.4288	58.5297	58.5297	65.8254	2.47	2.63	2.2	1.62	1.62
43	60	0	1	1	5.46	25070	0.65	96.4963	1400	1	0	1	1	1	1	62.0731	46.7813	51.99	30.7686			47.9033	62.0731	6.54	4.58	6.36	9.46			6.735	9.46	1		1400	3700	1900	7800		47.6376	62.6979	95.0744	96.4963	96.4963	96.4963	1.23	0.98	0.68	0.65	0.65
44	82	1	1	1	19.41	13240	0.98	71.5063	130	1	0	1	0	1	1	16.0784	8.93618	14.8085	2.6772	5.14546		9.52914	16.0784	13.62	24.76	15.4	13.62	7.62		15.004	24.76	1		130	1500	2000	2400		43.7976	55.9766	61.5094	65.7838	71.5063		1.47	1.2	1.11	1.05	0.98
45	63	0	1	1	6.47	15160	1.3	43.625	560	1	0	1	0	0	0	17.8019	23.8651	20.2082	18.0836	20.886		20.169	23.8651	4.78	8.72	5.36	9.46	15.4	10.56	9.04667	15.4	0			560	1300	3300	2300	42.4381	39.2082	39.2082	35.2681	35.5452	43.625	1.33	1.42	1.42	1.55	1.54
46	71	1	0	4	26.85	8840	4.27	13.0349	2300	1	0	4	0	0	0	20.7354		9.09913	12.7775	24.5771		16.7973	24.5771	5.76		7.08	7.34	9.46	9.4	7.808	9.46	1			3000		3000	2300	10.3198	10.3198	10.9023	11.4016	12.0076	13.0349	5.18	5.18	4.95	4.77	4.57
47	65	1	1	1	9.24	10810	2.86	22.0726	1600	0	1	1	0	1	0	42.3133	8.26489	42.6276	11.7089	15.8125	44.9595	27.6145	44.9595	5.56	8.42	6.82	8.42	8.42	9.46	7.85	9.46	3		1600					19.4903	17.1723	17.291	16.7121	22.0726		3.17	3.52	3.5	3.6	2.86
48	46	1	1	2	18.37	17130	0.57	123.144	3200	1	0	2	0	0		66.1994	15.7092	2.67197	34.4929		25.1219	28.8391	66.1994	11.02	10.56	11.02	73.78	12	9.08	21.2433	73.78	0	5900	3900	3200	9600	12000	7200	113.173	115.229	115.229	120.575	123.144	120.575	0.7	0.67	0.67	0.6	0.57
49	58	0	1	1	11.06	34370	1.08	56.5376	970	0	1	1	0	1	1	55.7631	2.54711		8.62839		34.5295	25.367	55.7631	12	25.9		10.56	13.62	30.98	18.612	30.98	3		970					20.7958	20.7958	14.5442	23.9198	56.5376		2.47	2.47	3.32	2.2	1.08
50	69	1	0	1	34.41	18390	0.99	77.388	0	1	0	1	0	0	0	15.6308		7.72562			4.53493	9.29712	15.6308	9.82			15.4	10.18	18.96	13.59	18.96	2							48.7868	58.9454	54.1577	63.895	77.388	67.3909	1.45	1.24	1.33	1.16	0.99
51	19	0	1	1	28.91	33670	0.54	136.799	200	1	0	1	0	0				12.831				12.831	12.831			7.88				7.88	7.88	0		200	1000	1100	2400		136.799	136.799	102.226	106.878	130.72		0.54	0.54	0.83	0.8	0.62
52	57	0	1	4	34.34	18000	0.53	105.396	1100	0	0	4	1	1	1	11.0107	33.4767		16.4181	14.9611		18.9666	33.4767	4.38	5.96		5.36	4.2	7.62	5.504	7.62	1			1400	1400	1100	1600	45.0834	47.7126	47.7126	61.0099	97.0993	105.396	1.31	1.25	1.25	1.02	0.68
53	68	0	1	1	18.37	12430	0.91	64.8274	0	0	1	1	0	1	1		7.41576	12.0366	11.2814	30.5224	99.1194	32.0751	99.1194	7.888	7.62	7.34	8.42	14.22	19.56	10.8413	19.56	3							46.8709	46.8709	53.2984	55.1628	64.8274	49.8962	1.19	1.19	1.07	1.04	0.91
54	68	1	1	1	12.07	12890	0.88	88.2631	510	1	0	1	0	0				14.2558	17.5259		32.9476	21.5764	32.9476			7.14		14.8	26.48	16.14	26.48	1		510	1400	985		2900	63.0292	63.0292	88.2631	58.2236	61.1448	76.0716	1.18	1.18	0.88	1.26	1.21
55	75	1	0	1	16.6	9510	1.85	34.8403	0	1	0	1	0	0	0	14.637	8.95016	52.2922		43.23	4.42299	24.7065	52.2922	42.52	51.76	51.22		91.62	70.1	61.444	91.62	1							29.382	29.382	29.382		31.1408	34.8403	2.13	2.13	2.13		2.03
56	86	0	1	1	23.7	14910	1	50.9713	1300	1	0	1	1	1	1			67.1589	13.8355	16.7636	14.1775	27.9839	67.1589			14.8	21.36	14.8	14.8	16.44	21.36	1			1300	2100	2700	2000	36.7743	40.079	40.4798	42.5987	46.9679	50.9713	1.31	1.22	1.21	1.16	1.07
57	59	1	1	2	17.86	58900	0.64	107.171	840	1	0	2	0	1	1	16.988	23.9171	3.18262				14.6959	23.9171	8.72	4.78	2.66				5.38667	8.72	1		1100	1100	840	2700	1900	72.295	82.017	82.017	86.1664	99.8629	107.171	1.11	1	1	0.96	0.76
58	68	1	0	2	22.95	30820	0.81	91.3218	0	0	0	2	0	0	0														37.06	37.06	37.06	1							48.3237	87.8542	89.5304	91.3218	89.101	70.9451	1.47	0.89	0.85	0.81	0.86
59	50	1	1	1	11.92	13700	0.8	104.161	2400	1	0	1	1	1	1												6.36	8.42		7.39	8.42	1		2900	2800	2400	2400	2400	65.4428	68.6992	66.0713	78.7249	81.4265	104.161	1.27	1.22	1.26	1.09	1.06
60	44	1	1	1	27.93	13420	2.69	27.5483	25	0	0	1	1	1	1													23.04		23.04	23.04	3	700	310	540	80	250	25	27.5483	20.4628	14.8286	11.784	9.6059	5.98474	2.69	3.44	4.49	5.43	6.43
[truncated: 13 more columns]
